# Supplementary material for: Chalcogen alloying mediated electronic structure modulation in ultrathin Nb(SxSe(1−x))2 nanosheets for the hydrogen evolution reaction
Source: Royal Society of Chemistry journal article supplement (doi:10.1039/d3ta07414e), 2024-01-01
Supplement: d3ta07414e1.pdf [file d3ta07414e1.pdf]

## Electronic Supplementary Information

### Chalcogen Alloying Mediated Electronic Structure Modulation in Nb(S<sub>x</sub>Se<sub>(1-x)</sub>)<sub>2</sub> Nanosheets for Hydrogen Evolution Reaction

Varsha Jha<sup>a</sup>, Md. Samim Hassan<sup>a</sup>, Ankita Kumari<sup>a</sup>, Shubham Kumar<sup>a</sup>, Sahil Singh<sup>a</sup>, Jyoti Yadav<sup>a</sup>, Dibyajyoti Ghosh,<sup>a,b,#</sup> and Sameer Sapra<sup>a,\*</sup>

<sup>a</sup>Department of Chemistry, Indian Institute of Technology Delhi, Hauz Khas, New Delhi 110016, India

<sup>b</sup>Department of Materials Science and Engineering, Indian Institute of Technology Delhi, Hauz Khas, New Delhi 110016

\*Email: [sapra@chemistry.iitd.ac.in](mailto:sapra@chemistry.iitd.ac.in)

# Email: [dibyajyoti.ghosh@mse.iitd.ac.in](mailto:dibyajyoti.ghosh@mse.iitd.ac.in)

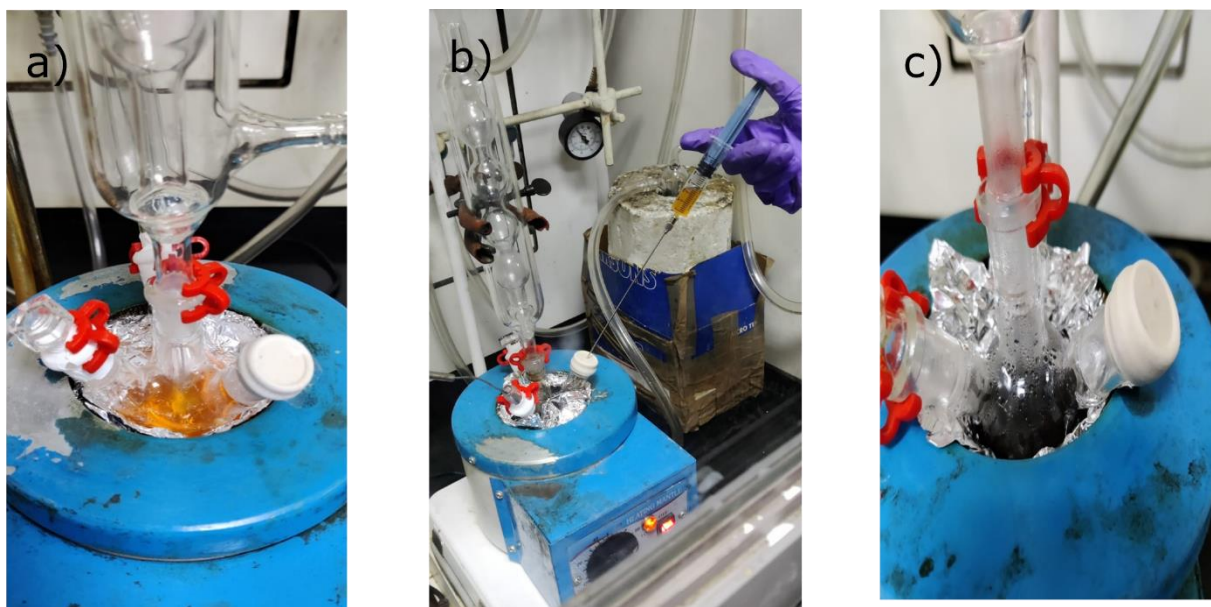

**Fig. S1** (a) color of precursor solution containing  $(\text{PhCH}_2)_2\text{Se}_2/(\text{PhCH}_2)_2\text{S}_2$ ,  $\text{NbCl}_5$  and oleyl amine (OLAM); (b) dropwise injection of precursor solution into pre-heated OLAM solution kept at 300 °C; (c) color change to black upon precursor injection.

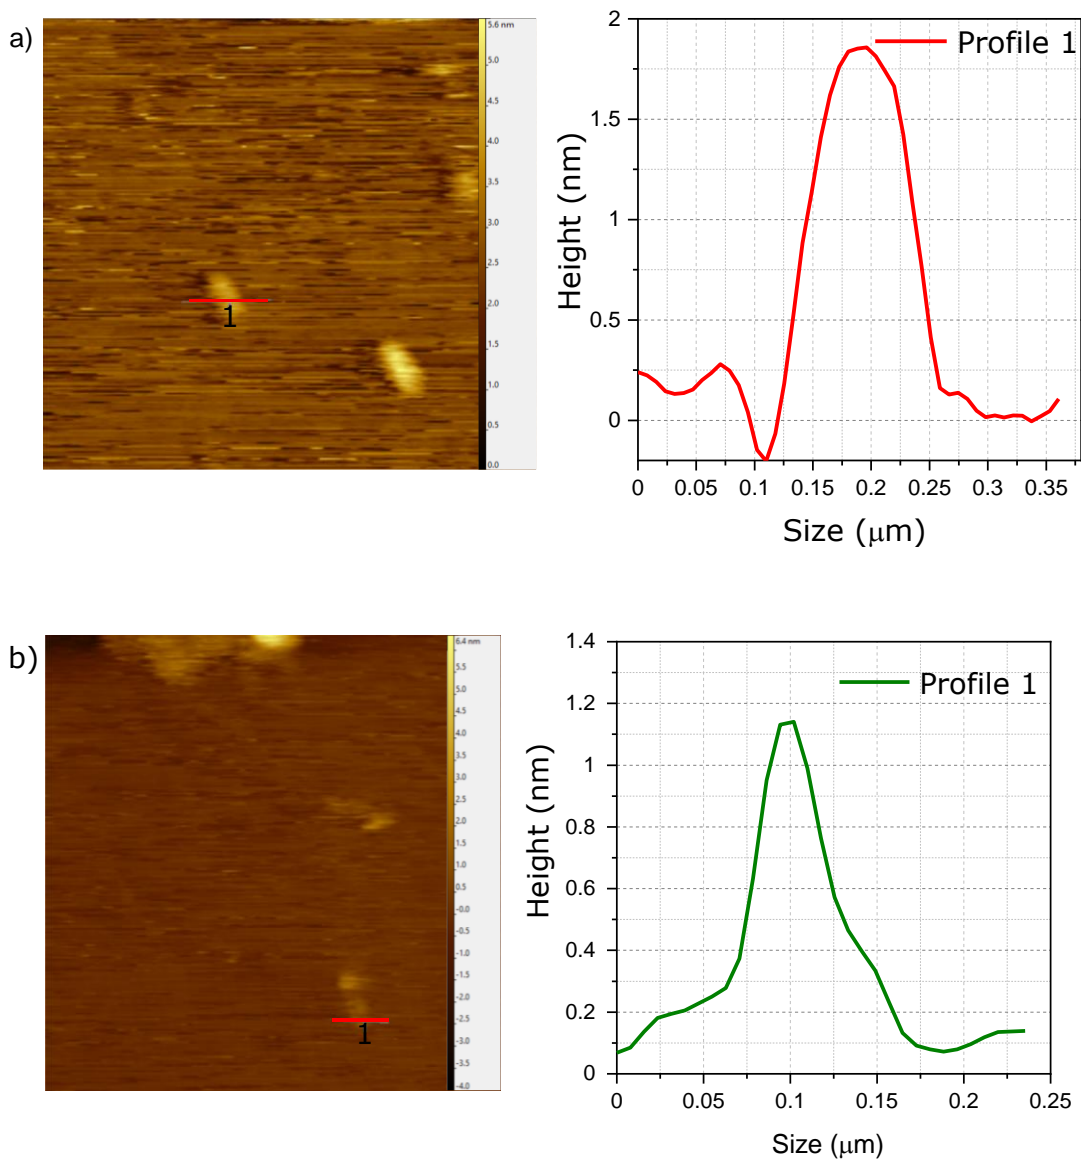

**Fig. S2** AFM images: (a) NbSe<sub>2</sub>; (b) NbS<sub>2</sub> nanosheets. For NbSe<sub>2</sub>, height profile is 1.8 nm, confirming 2 layers thickness. Whereas for NbS<sub>2</sub> it is 1.2 nm which confirms approximately 1 layer thickness, considering the presence of OLAM ligand (0.5 nm)<sup>1</sup>. This confirms the transformation from monolayer to bilayer thickness, along c-axis with increasing Se content.

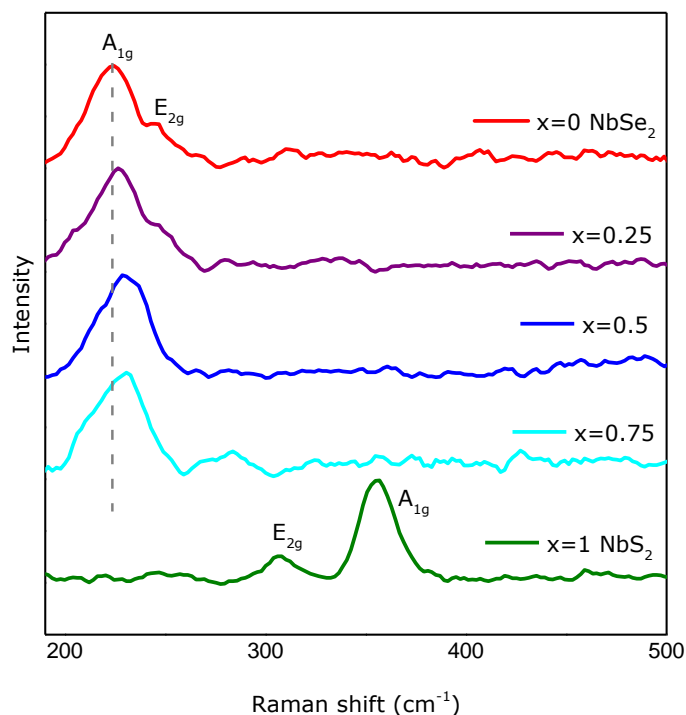

**Fig. S3** Raman spectra of  $\text{Nb}(\text{S}_x\text{Se}_{(1-x)})_2$  NSs under 532nm laser.

To comprehend the structure of  $\text{Nb}(\text{S}_x\text{Se}_{(1-x)})_2$ , Raman spectra were collected under a 532 nm laser. It displays two vibration modes with Nb-Se modes at a lower frequency than Nb-S modes. The spectrum for  $\text{NbSe}_2$  shows contribution from two peaks, i.e., in-plane  $E_{2g}$  mode ( $245 \text{ cm}^{-1}$ ) and out-of-plane  $A_{1g}$  mode ( $225 \text{ cm}^{-1}$ ) vibrations.<sup>2</sup> With initial  $x = 0.25$  doping of S, there is slight shift towards the higher wavenumber observed due the softening of Nb-Se modes. For  $x=0.25, 0.5$  and  $0.75$  there is dominance of Nb-Se modes compared to Nb-S modes which is indicative of relatively higher Se concentration in  $\text{Nb}(\text{S}_x\text{Se}_{(1-x)})_2$ .<sup>3</sup> Complete substitution of Se with S in  $\text{NbS}_2$  features peaks at  $307 \text{ cm}^{-1}$  and  $355 \text{ cm}^{-1}$  assignable to  $E_{2g}$  and  $A_{1g}$  modes, respectively.<sup>4</sup>

$x = 0$   
 $\text{NbSe}_2$

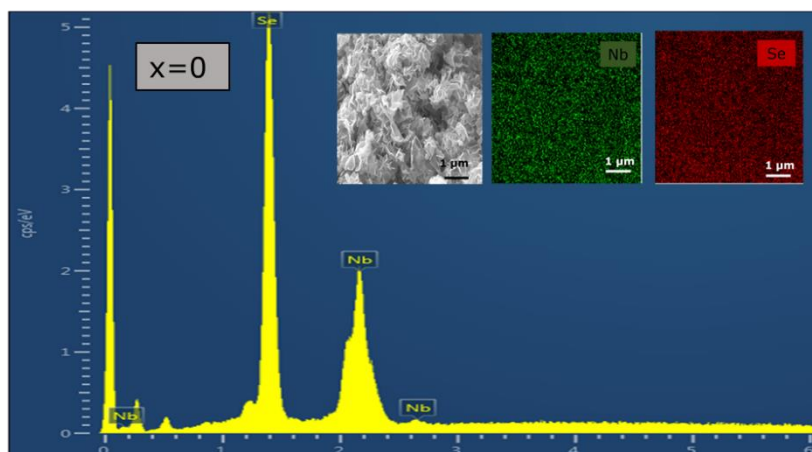

$x = 0.25$   
 $\text{NbS}_{1/2}\text{Se}_{2/3}$

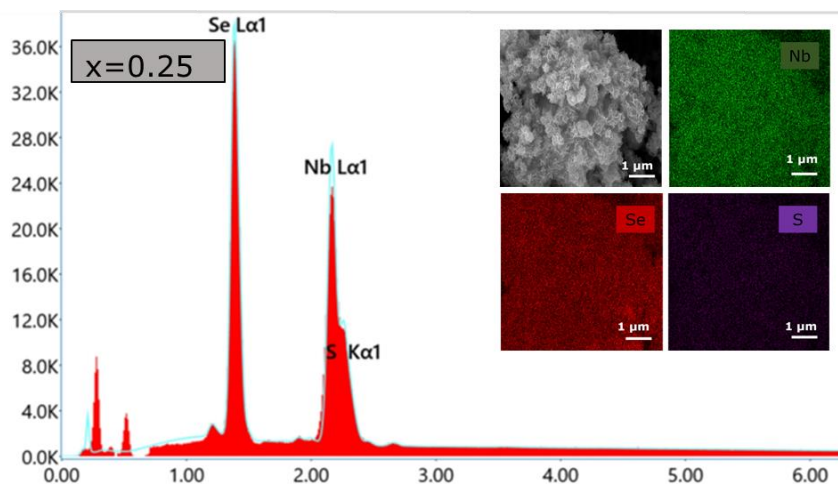

$x = 0.75$   
 $\text{NbS}_{2/3}\text{Se}_{1/2}$

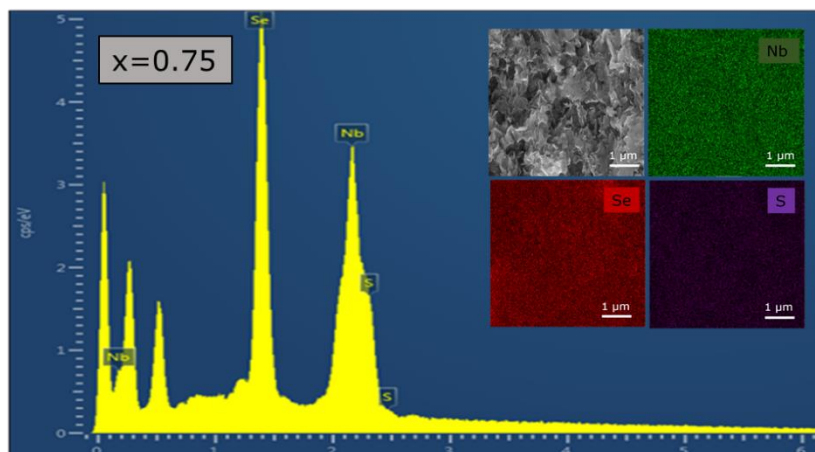

**x = 1**  
**NbS<sub>2</sub>**

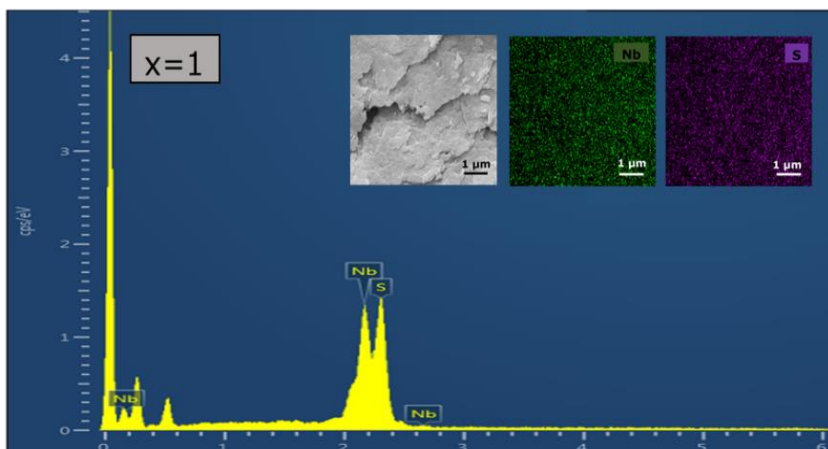

**Fig. S4** FE-SEM based corresponding elemental distribution maps and spectrum showing uniform distribution of Nb, Se and S of  $x = 0$ ;  $0.25$ ;  $x = 0.75$ ;  $x = 1$ . The FE-SEM image shows sheet type surface morphology. EDX spectrum exhibits relatively high atomic percentage of Se w.r.t. S.

| Loaded composition                               | EDX Composition |            |             |
|--------------------------------------------------|-----------------|------------|-------------|
|                                                  | At. % of Nb     | At. % of S | At. % of Se |
| X = 0 (NbSe <sub>2</sub> )                       | 36.46           | -          | 63.54       |
| X = 0.25 (NbS <sub>1/2</sub> Se <sub>3/2</sub> ) | 38.1            | 3.12       | 58.2        |
| X = 0.5 (NbSSe)                                  | 37.9            | 9.31       | 46.24       |
| X = 0.75 (NbS <sub>3/2</sub> Se <sub>1/2</sub> ) | 37.5            | 15.47      | 39.8        |
| X = 1 (NbS <sub>2</sub> )                        | 43.64           | 56.36      | -           |

**Table S1** S:Se ratios of loaded composition and FE-SEM EDX elemental mapping for all compositions highlighting the actual S content is lesser compared to the nominal amounts. To explain this observation, we propose the reason to be difference in rate of decomposition of the

chalcogen precursors with C-S bond being relatively stronger than C-Se bond (Bond dissociation energy: C-S: 699 KJ/mol and C-Se: 582 KJ/mol)<sup>5</sup> and hence lesser S goes into the lattice than feed in amounts.

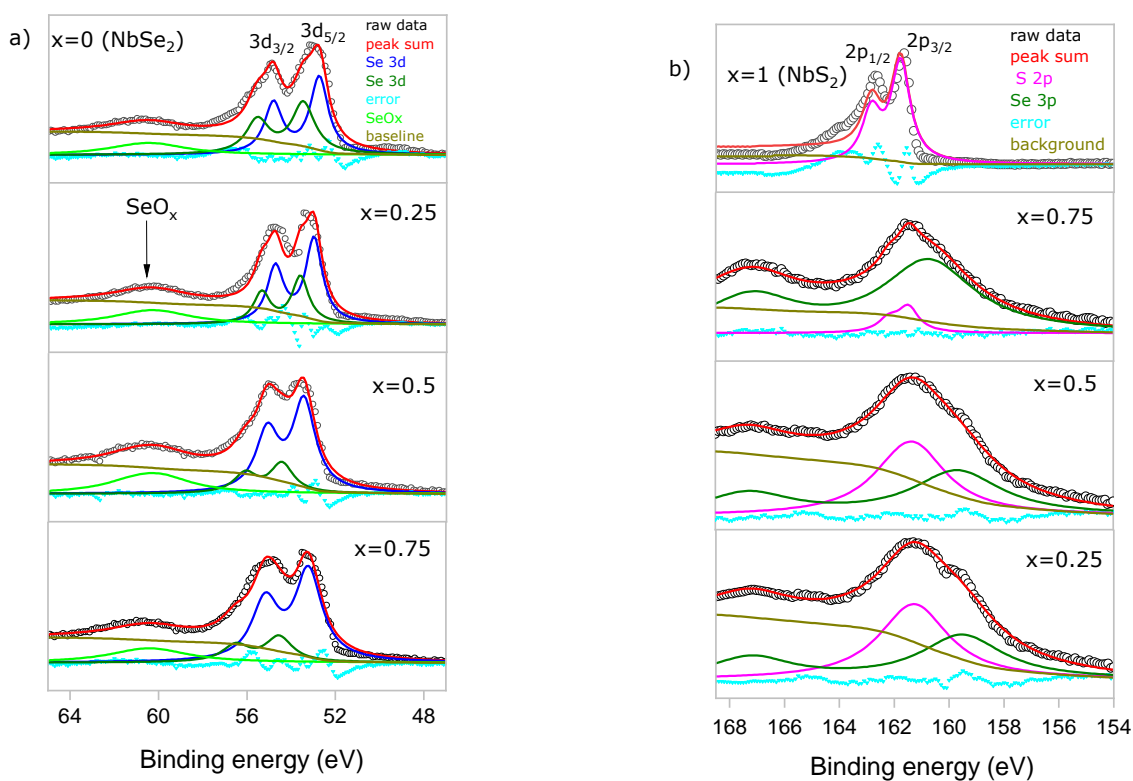

**Fig. S5** high resolution XPS spectra of (a) Se - 3d spectra shows two peaks at 53.01 and 54.94 eV corresponding to 3d<sub>5/2</sub> and 3d<sub>3/2</sub> binding energies.<sup>6,7</sup> The 3d spectra of Se can be deconvoluted into two doublets possibly due to presence of Se intermediates left over from the decomposition of (PhCH<sub>2</sub>)<sub>2</sub>Se<sub>2</sub>.<sup>8</sup> Also, there is peak due to SeO<sub>x</sub> in all compositions; (b) S-2p spectra.

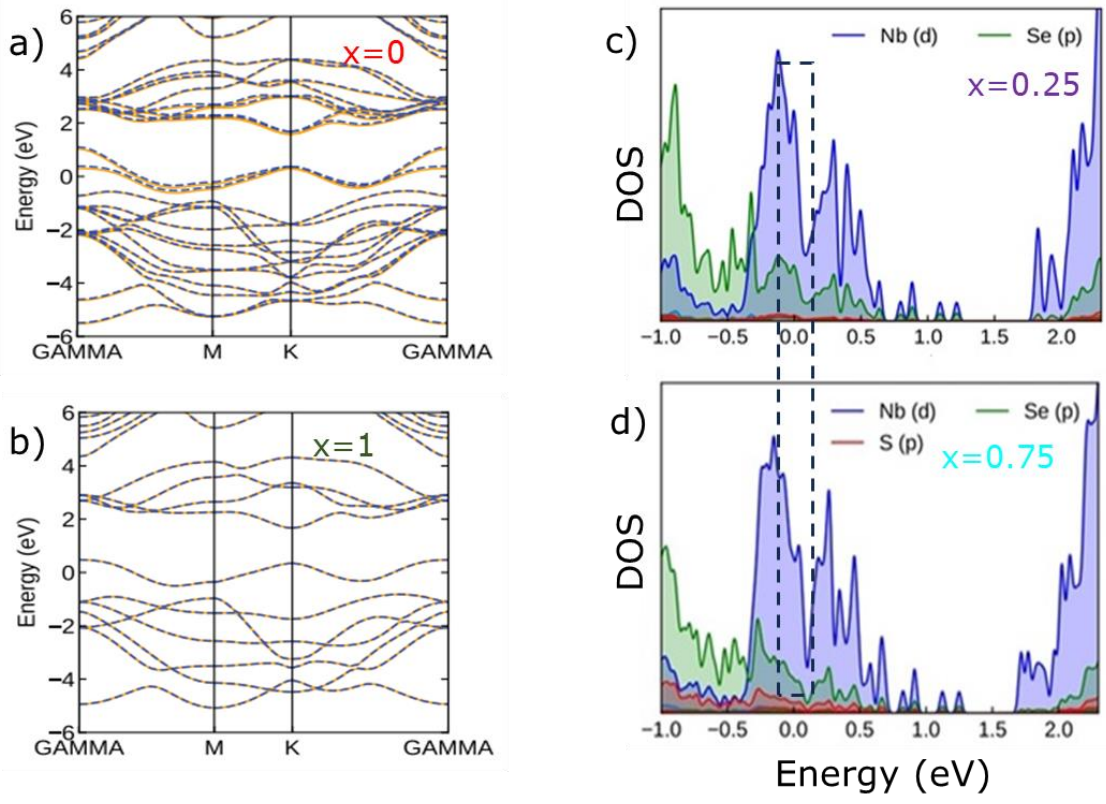

**Fig. S6** (a,b) band plots of bilayer NbSe<sub>2</sub> and monolayer NbS<sub>2</sub>; (c,d) DOS plots of  $x=0.25$ ,  $x=0.75$  for Nb(S<sub>x</sub>Se<sub>(1-x)</sub>)<sub>2</sub> showing variation in d band contribution at fermi level with chalcogen variation.



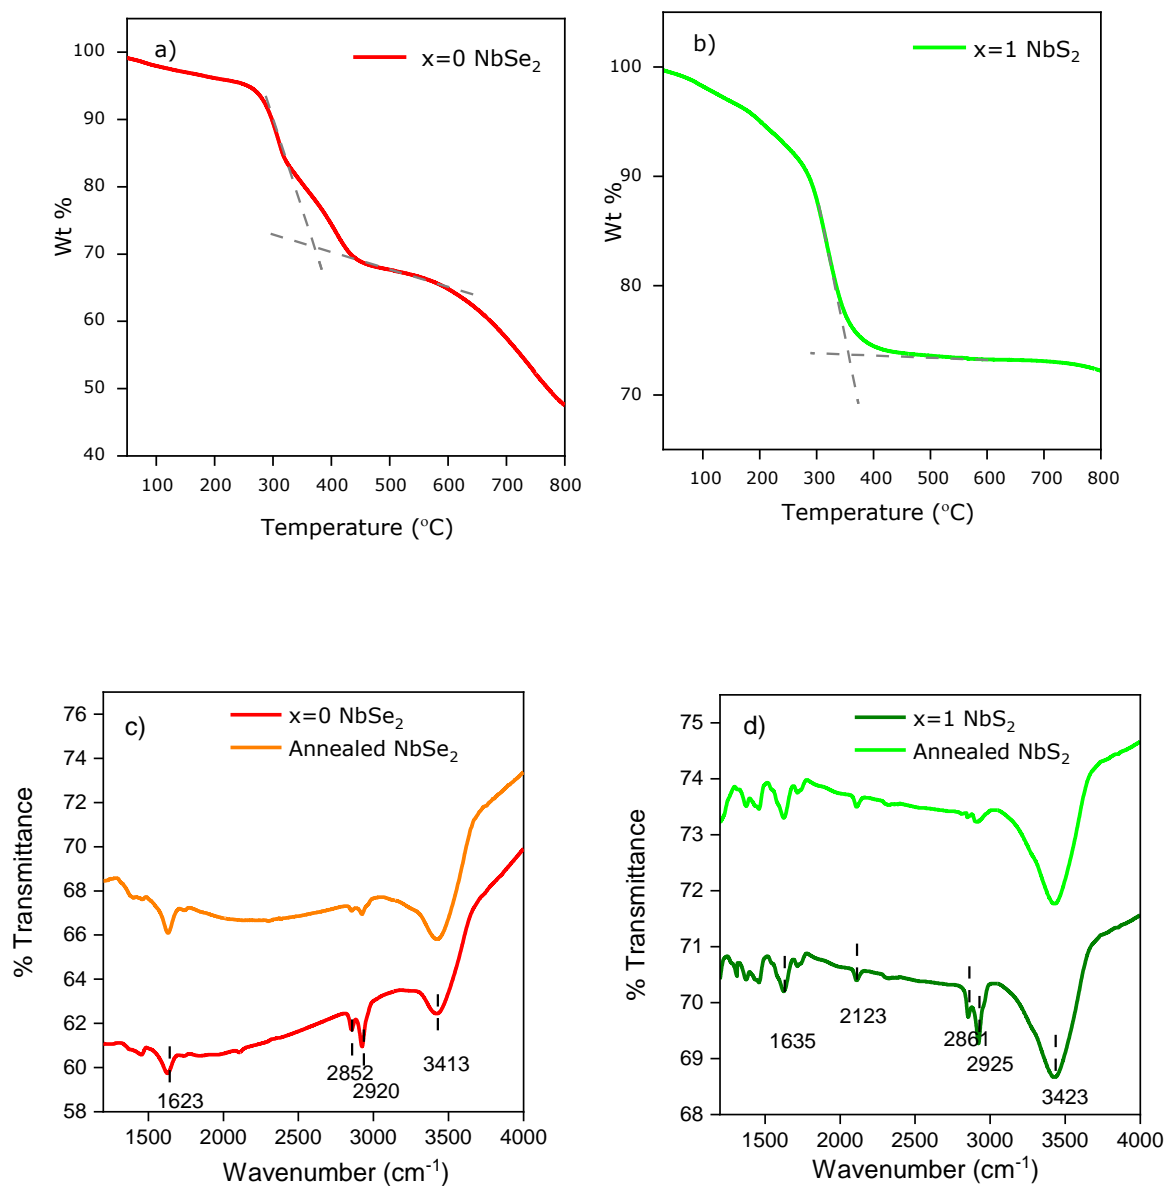

**Fig. S7** (a,b) TGA curves of NbSe<sub>2</sub> and NbS<sub>2</sub> nanosheets (NSs) respectively showing approximately 30% loss in the molecular weight at 368°C corresponding to loss due to surface OLAM ligand. Surface ligands were removed to enhance the conductivity; (c,d) FTIR spectra of NbSe<sub>2</sub> and NbS<sub>2</sub> NSs respectively, before and after annealing at 500°C. All other compositions were also annealed at 500°C for electrochemical studies.

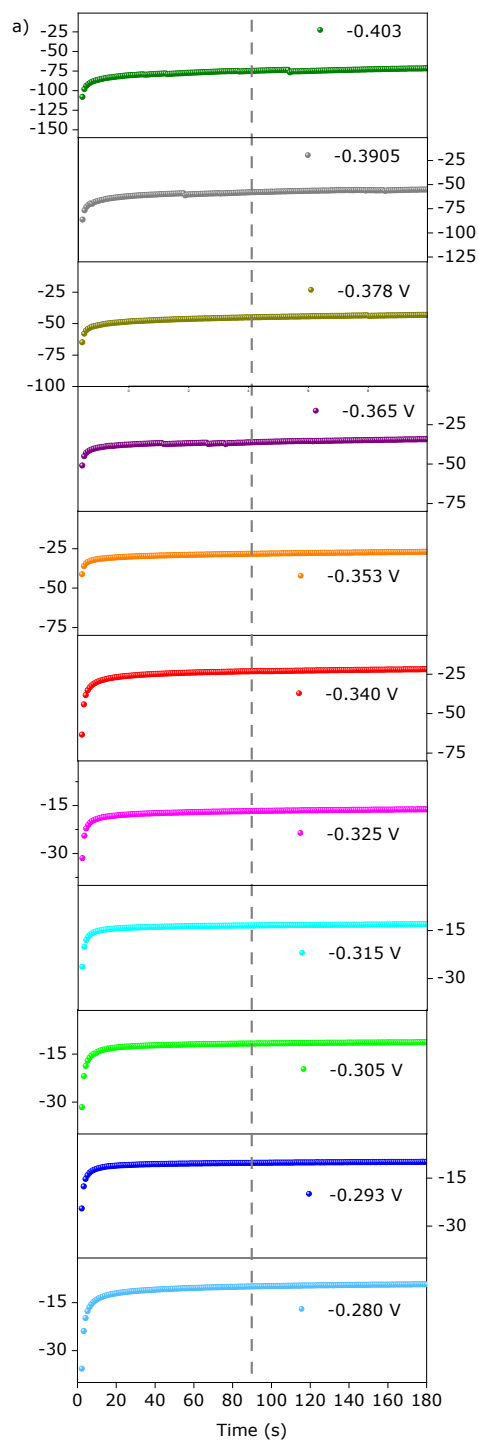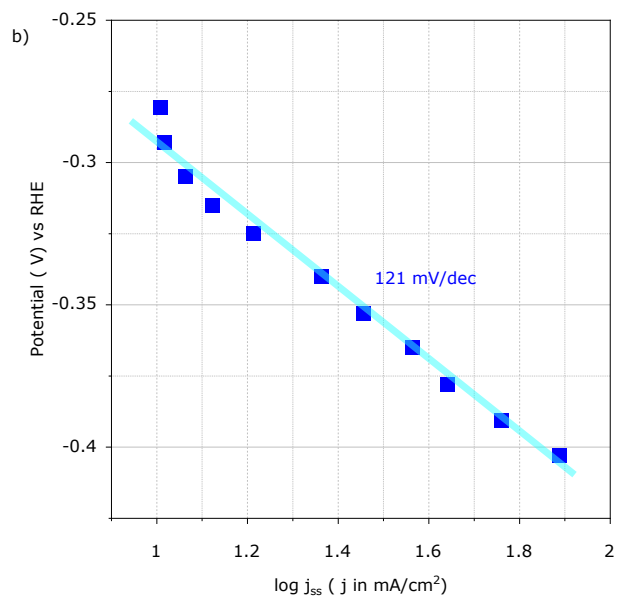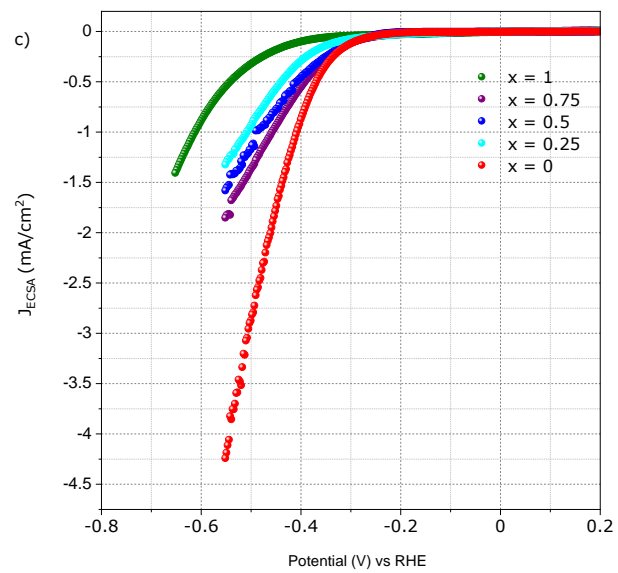

**Fig. S8** (a) For  $x = 0.5$  (NbSSe), chronoamperometry response at different potentials referenced w.r.t. RHE; (b) corresponding linear fit of steady state current density at 90<sup>th</sup> second gives the tafel slope of 121mV/dec for  $x = 0.5$  composition; (c) LSV curves with current density normalized w.r.t ECSA showing high intrinsic conductivity of  $x = 0.5$  composition.

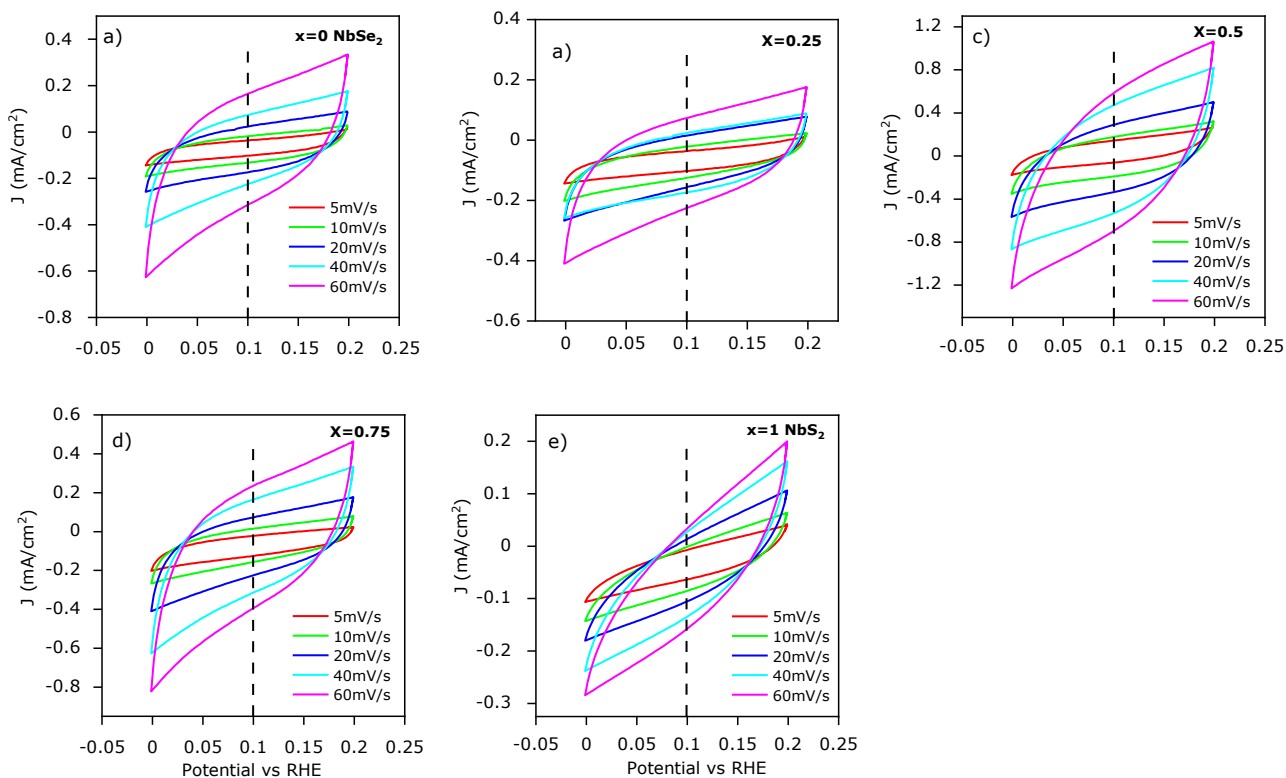

**Fig. S9** (a-e) Cyclic voltammetric curves of Nb(S<sub>x</sub>Se<sub>(1-x)</sub>)<sub>2</sub> for  $x = 0, 0.25, 0.5, 0.75, 1$ . CV for all compositions of 2D Nb(S<sub>x</sub>Se<sub>(1-x)</sub>)<sub>2</sub> NSs were collected in the non-faradaic potential window i.e., 0 – 0.2V vs RHE at scan rates 5 mV /s, 10 mV /s, 20 mV/s, 40 mV/s and 60 mV/s.

## ECSA calculations:

Cyclic voltammetry curves were collected in the non-faradaic region. Half of the difference in the anodic and cathodic current densities at the intermediate value of CV curves (i.e. 0.1 V) was plotted as a function of scan rate. Linear fitting of the graph gives double layer capacitance (Cdl). Cdl values are a direct measure of the electrochemical surface area.<sup>9,10</sup>

$$ECSA = C_{dl}/C_s$$

$C_s$  is the specific capacitance, the value of which is  $40 \mu F cm^{-2}$  per  $cm^2_{ECSA}$

## Electrochemical Impedance fitting parameters:

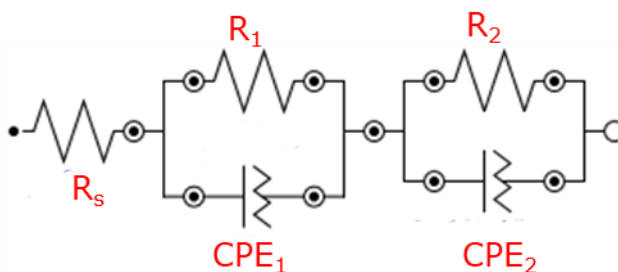

|                      | X = 0<br>NbSe <sub>2</sub> | X = 0.25<br>NbS <sub>1/2</sub> Se <sub>3/2</sub> | X = 0.5<br>NbSSe | X = 0.75<br>NbS <sub>3/2</sub> Se <sub>1/2</sub> | X = 1<br>NbS <sub>2</sub> |
|----------------------|----------------------------|--------------------------------------------------|------------------|--------------------------------------------------|---------------------------|
| R <sub>s</sub>       | 14.8 Ω                     | 24.1 Ω                                           | 6.42 Ω           | 10.2 Ω                                           | 30.3 Ω                    |
| R <sub>ct</sub> (R1) | 663 Ω                      | 822 Ω                                            | 246 Ω            | 452 Ω                                            | 4.82 kΩ                   |
| R <sub>ct</sub> (R2) | 35.2 Ω                     | 102 Ω                                            | 31.4 Ω           | 32.3 Ω                                           | 205 Ω                     |

**Table S2** fitting parameter values of the Nyquist plot obtained via Electrochemical Impedance Spectroscopy.  $R_s$  : Solution resistance;  $R_1, R_2$  : Electrolyte and charge transfer resistance ;  $CPE$  : Constant phase element

|                                                                                                                                                                                                     | <b>Synthesis methodology</b>                              | <b><math>\eta</math> (<math>j = 10 \text{ mA/cm}^2</math>)</b> | <b>Tafel slope (b)</b>                                   | <b>Reference</b> |
|-----------------------------------------------------------------------------------------------------------------------------------------------------------------------------------------------------|-----------------------------------------------------------|----------------------------------------------------------------|----------------------------------------------------------|------------------|
| NbSeS (x=0.5)                                                                                                                                                                                       | Hot injection colloidal synthesis                         | 290 mV                                                         | 75 mV/dec                                                | <b>This work</b> |
| NbS <sub>2</sub> /rGO composite                                                                                                                                                                     | Solid state synthesis                                     | 500 mV                                                         | 72mV/dec                                                 | <sup>11</sup>    |
| P-Se co-doped NbS <sub>2</sub>                                                                                                                                                                      | Liquid-phase phosphating selenization pyrolysis method    | 363 mV                                                         | 116.7 mV/dec                                             | <sup>12</sup>    |
| 3R NbS <sub>2</sub>                                                                                                                                                                                 | Solid state synthesis                                     | 467 mV                                                         | 110 mV/dec                                               | <sup>13</sup>    |
| Li- TFSI treated NbS <sub>2</sub>                                                                                                                                                                   | Solid state synthesis                                     | 310 mV                                                         | -                                                        | <sup>14</sup>    |
| Few layer NbS <sub>2</sub>                                                                                                                                                                          | Electrochemical exfoliation of bulk NbS <sub>2</sub>      | 236 mV                                                         | 125 mV/dec                                               | <sup>15</sup>    |
| Exfoliated NbSeS and Co doped NbSeS                                                                                                                                                                 | CVT                                                       | 346 mV<br>173 mV                                               | 147 mV/dec<br>64 mV/dec                                  | <sup>16</sup>    |
| Nb <sub>2</sub> Se <sub>9</sub> without centrifugation<br>Nb <sub>2</sub> Se <sub>9</sub> at 2000 rpm<br>Nb <sub>2</sub> Se <sub>9</sub> at 4000 rpm<br>Nb <sub>2</sub> Se <sub>9</sub> at 6000 rpm | Flux method<br>Vacuum filtration over porous carbon paper | -310 mV<br>-294 mV<br>-203 mV<br>-170 mV                       | 129.7 mV/dec<br>108 mV/dec<br>86.7 mV/dec<br>82.2 mV/dec | <sup>17</sup>    |

**Table S3** Comparison of HER activity of Nb based dichalcogenide electrocatalysts in 0.5M H<sub>2</sub>SO<sub>4</sub>.

### **Vacancy formation energy:**

To calculate the defect formation energy ( $E_f$ ) of the S/Se vacancy, the following expression was used:

$$E_f(vac) = E(vac) - E(pristine) - \mu(S \text{ or } Se)$$

where  $E(Vac)$  is the total energy of system with an S or Se vacancy,  $E(pristine)$  is the total energy of the system without any defects, and S/Se is the chemical potential of S or Se.

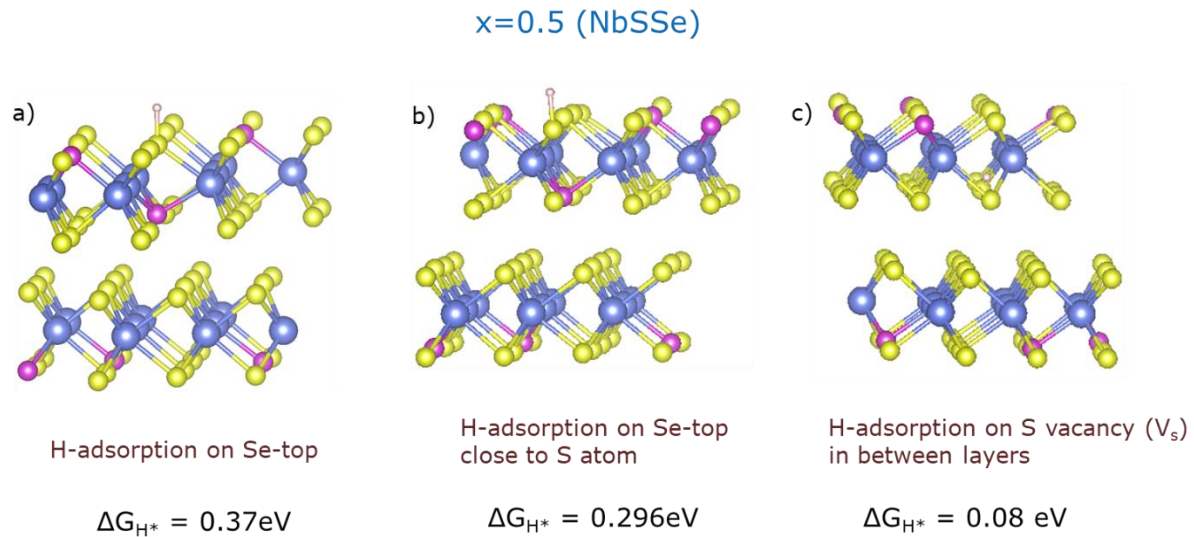

**Fig. S10** (a,b) chemical structure of reaction intermediates for H adsorbed on  $Se_{top}$  and  $Se_{top}$  near S for defect free model in  $x=0.5$  (NbSeS) composition respectively. Lower Gibbs free energy ( $\Delta G_{H^*}$ ) value reflects role of polarized electric field in alloy sample due to crystal distortion leading to easy desorption process; (c) reaction intermediate depicting H adsorption on sulphur vacancy ( $V_s$ ) in between layers.

### Gibbs Free Energy Calculations:

By using an equation, we were able to estimate the Gibbs free energy of atomic hydrogen adsorption.

$$\Delta G_H = \Delta E_H + ZPE - T\Delta S_H$$

$$\Delta E_H = E_{\text{Nb}(\text{SxSe}(1-x))_2 + \text{H}} - E_{\text{Nb}(\text{SxSe}(1-x))_2} - \frac{1}{2} E_{\text{H}_2}$$

$\Delta E_H$  represents energy of hydrogen adsorption. The equation considers the difference in hydrogen's zero-point energy and entropy between its adsorbed state and its gas phase.

### Post HER Characterization of $x = 0.5$ (NbSSe):

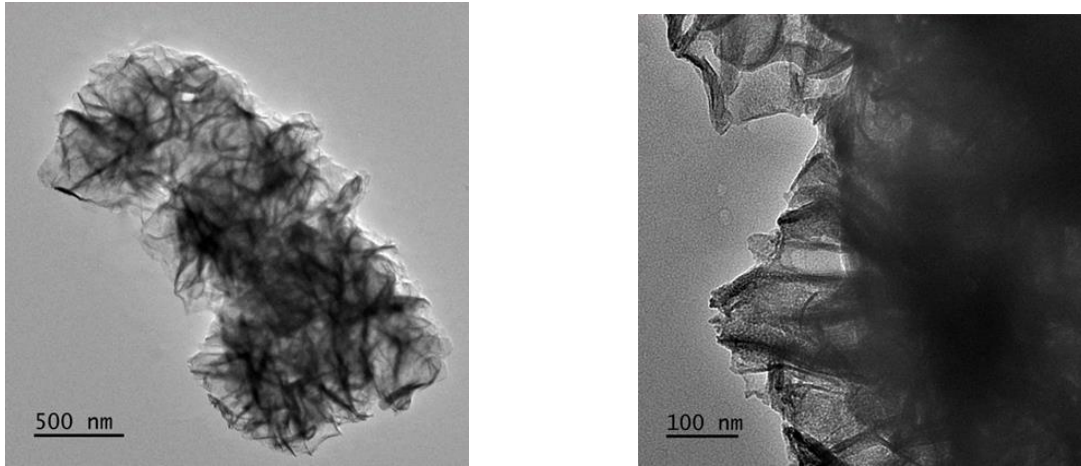

**Fig. S11** TEM image of  $x = 0.5$  (NbSSe) after 9 h of chronoamperometry response. TEM image shows that the nanosheet morphology is retained after electro-catalysis.

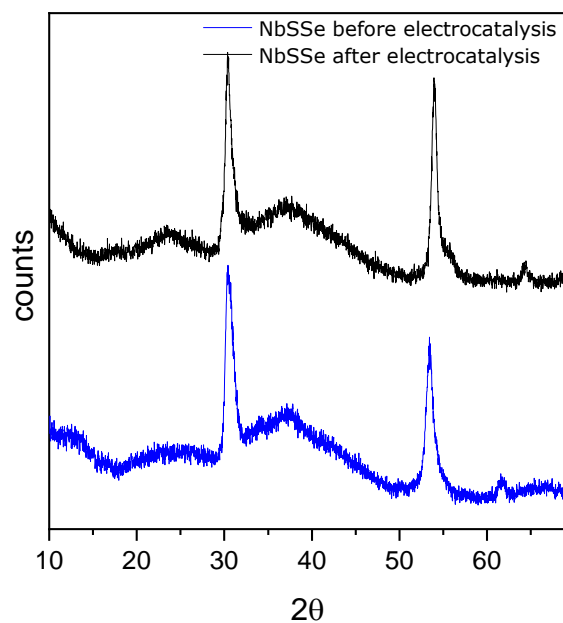

**Fig. S12** XRD Pattern before and after electro-catalysis of NbSSe showing no phase change or formation of any other active species. The XRD pattern shows that the catalyst remains structurally stable during the HER process.

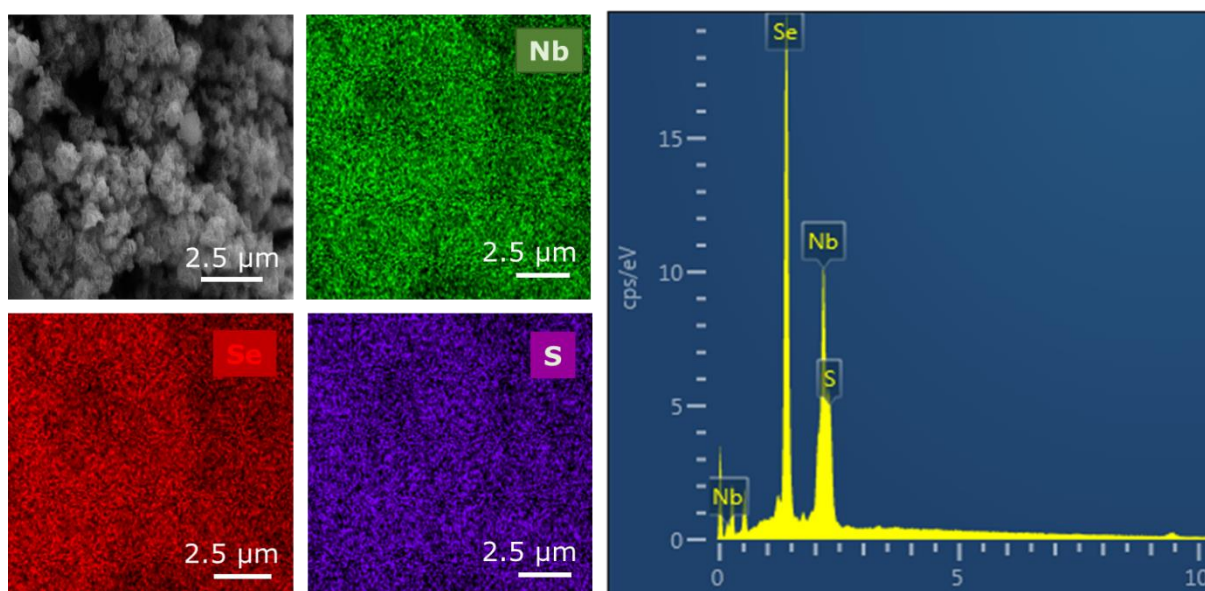



**Fig. S13** After electro-catalysis FE-SEM image, corresponding elemental mapping and spectrum of  $x = 0.5$  (NbSSe) showing uniform distribution of elements i.e. Nb, Se and S. The spectrum clearly shows the detected elements are retained after running chronoamperometry response.

## References:

- 1 M. S. Hassan, A. Jana, S. Gahlawat, N. Bhandary, S. Bera, P. P. Ingole and S. Sapra, *Bull. Mater. Sci.*, 2019, **42**, 74.
- 2 S. Naik, A. Pradhan, A. Mishra and S. L. Samal, *J. Phys. Chem. C*, 2022, **126**, 13762–13773.
- 3 O. E. Meiron, L. Houben and M. Bar-Sadan, *RSC Adv.*, 2015, **5**, 88108–88114.
- 4 A. Mansouri and N. Semagina, *ACS Appl. Nano Mater.*, 2018, **1**, 4408–4412.
- 5 T.L. Cottrell, *The Strengths of Chemical Bonds*, 1958, 41-53.
- 6 Q. Gong, L. Cheng, C. Liu, M. Zhang, Q. Feng, H. Ye, M. Zeng, L. Xie, Z. Liu and Y. Li, *ACS Catal.*, 2015, **5**, 2213–2219.
- 7 Q. Fu, L. Yang, W. Wang, A. Han, J. Huang, P. Du, Z. Fan, J. Zhang and B. Xiang, *Adv. Mater.*, 2015, **27**, 4732–4738.
- 8 R. W. Lord, J. Fanghanel, C. F. Holder, I. Dabo and R. E. Schaak, *Chem. Mater.*, 2020, **32**, 10227–10234.
- 9 M. S. Hassan, P. Basera, S. Gahlawat, P. P. Ingole, S. Bhattacharya and S. Sapra, *J. Mater. Chem. A*, 2021, **9**, 9837–9848.
- 10 A. Singh, J. Rohilla, M. S. Hassan, C. Trupthi Devaiah, P. P. Ingole, P. K. Santra, D. Ghosh and S. Sapra, *ACS Appl. Nano Mater.*, 2022, **5**, 4293–4304.
- 11 D. Gopalakrishnan, A. Lee, N. K. Thangavel and L. M. Reddy Arava, *Sustain. Energy Fuels*, 2018, **2**, 96–102.
- 12 W. Shen, L. Qiao, J. Ding and Y. Sui, *Appl. Surf. Sci.*, 2022, **581**, 152419.
- 13 P. Chithaiah, S. Mallick, D. C. Binwal, A. Bhui and C. N. R. Rao, *New J. Chem.*, 2023, **47**, 17098-17102.

- 14 L. Najafi, S. Bellani, R. Oropesa-Nuñez, B. Martín-García, M. Prato, V. Mazánek, D. Debellis, S. Lauciello, R. Brescia, Z. Sofer and F. Bonaccorso, *J. Mater. Chem. A*, 2019, **7**, 25593–25608.
- 15 J. Si, Q. Zheng, H. Chen, C. Lei, Y. Suo, B. Yang, Z. Zhang, Z. Li, L. Lei, Y. Hou and K. Ostrikov, *ACS Appl. Mater. Interfaces*, 2019, **11**, 13205–13213.
- 16 Y. Ren, X. Miao, J. Zhang, Q. Lu, Y. Chen, H. Fan, F. Teng, H. Zhai, X. He, Y. Long, C. Zhang and P. Hu, *J. Mater. Chem. A*, 2023, **11**, 2690–2697.
- 17 F. O. T. Agyapong-Fordjour, S. Oh, J. Lee, S. Chae, K. H. Choi, S. H. Choi, S. Boandoh, W. Yang, J. Huh, K. K. Kim and J. Y. Choi, *ACS Appl. Energy Mater.*, 2019, **2**, 5785–5792.
